# Supplementary material for: Pleiotropic Modulation of Chitooligosaccharides on Inflammatory Signaling in LPS-Induced Macrophages
Source: MDPI journal article supplement (doi:10.3390/polym15071613), 2023-03-23
Supplement: s1 [file s1]

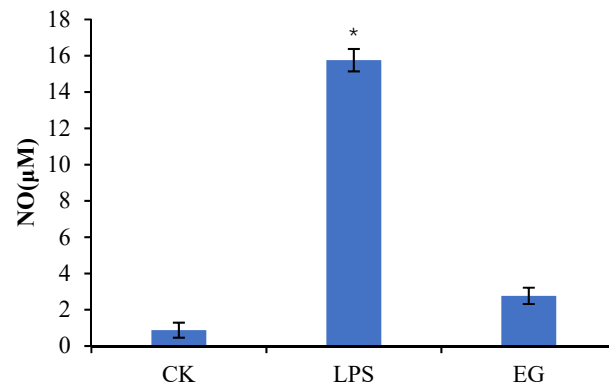

Fig.S1 NO secretion by the cells used in this experiment.

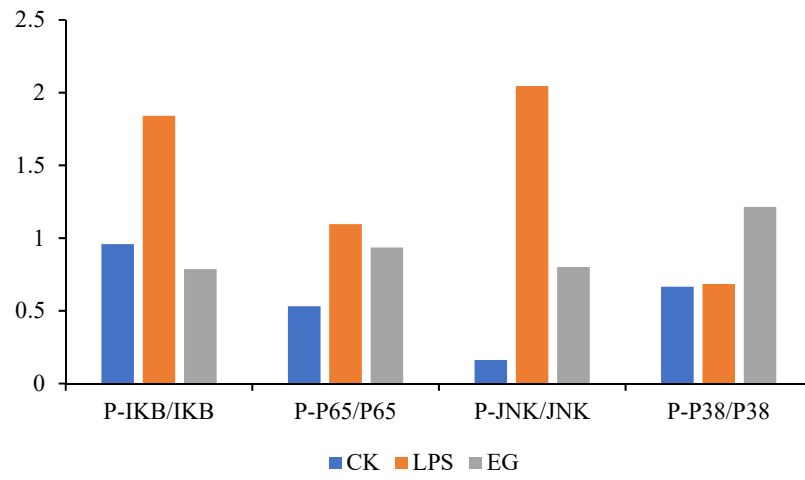

Fig.S2 Quantitative analysis results of WB
